# Supplementary material for: Revolutionizing personalized medicine with generative AI: a systematic review
Source: Springer Nature journal article supplement (doi:10.1007/s10462-024-10768-5), 2024-04-24
Supplement: MOESM1 [file 27014206]

## **Appendix I**

Search terms on Scopus and PubMed databases

| Databases | Search Term Combinations | Search Results |
| --- | --- | --- |
| Scopus | ( TITLE-ABS-KEY ( "large language model*" OR "large vision model*" OR "generative deep" OR "foundation model*" OR "generative model*" OR "generative" OR "generative artificial intelligence" OR "gan" OR "generative adversarial network*" OR "vae" OR "variational autoencoder*" OR "transformer model*" OR "diffusion model*" ) AND TITLE-ABS-KEY ( "precision medicine*" OR "precision treatment*" OR "personalized medicine*" OR "personalized treatment*" OR "genomic medicine*" OR "Individualized Medicine*" OR "patient-centric medicine*" OR "Therapeutic Individualization*" OR "targeted therapy*" OR "personalized healthcare" OR "pharmacogenomics*" OR "molecular profiling*" OR "biomarker-driven therapy*" OR "genomic profiling*" OR "stratified medicine*" OR "tailored therapy*" OR "molecular medicine*" OR "predictive medicine*" OR "stratified treatment*" OR "genomic profiling*" OR "molecular diagnostics*" OR "personalized healthcare*" OR "molecular-targeted therapy*" OR "patient-specific therapy*" OR "P4 medicine*" OR "omics-based medicine*" OR "individualized therapy*" OR "genomic-guided therapy*" OR "systems medicine*" ) ) AND PUBYEAR > 2013 AND PUBYEAR < 2024 AND ( LIMIT-TO ( DOCTYPE , "ar" ) ) AND ( LIMIT-TO ( LANGUAGE , "English" ) ) | 352 |
| PubMed | ((("large language model"[MeSH Terms] OR "large language model*"[Title/Abstract]) OR ("large vision model"[MeSH Terms] OR "large vision model*"[Title/Abstract]) OR ("deep learning" OR "deep neural network*") OR ("foundation model*"[Title/Abstract]) OR ("generative model*"[Title/Abstract]) OR ("generative" OR "generative AI" OR "generative artificial intelligence"[Title/Abstract]) OR ("gan"[MeSH Terms] OR "generative adversarial network*"[Title/Abstract]) OR ("vae"[MeSH Terms] OR "variational autoencoder*"[Title/Abstract]) OR ("transformer model*"[Title/Abstract]) OR ("diffusion model*"[Title/Abstract])) AND ((("personalized medicine"[MeSH Terms] OR "precision medicine"[MeSH Terms]) OR ("personalized treatment*"[Title/Abstract] OR "precision treatment*"[Title/Abstract]) OR ("genomic medicine"[MeSH Terms]) OR ("individualized medicine"[Title/Abstract]) OR ("patient-centric medicine"[Title/Abstract]) OR ("therapeutic individualization"[Title/Abstract]) OR ("targeted therapy"[MeSH Terms]) OR ("personalized healthcare"[Title/Abstract]) OR ("pharmacogenomics"[MeSH Terms]) OR ("molecular profiling"[Title/Abstract]) OR ("biomarker-driven therapy"[Title/Abstract]) OR ("genomic profiling"[Title/Abstract]) OR ("stratified medicine"[MeSH Terms]) OR ("tailored therapy"[Title/Abstract]) OR ("molecular medicine"[MeSH Terms]) OR ("predictive medicine"[MeSH Terms]) OR ("stratified treatment*"[Title/Abstract]) OR ("genomic profiling*"[Title/Abstract]) OR ("molecular diagnostics"[MeSH Terms]) OR ("personalized healthcare*"[Title/Abstract]) OR ("molecular-targeted therapy"[Title/Abstract]) OR ("patient-specific therapy"[Title/Abstract]) OR ("P4 medicine"[Title/Abstract]) OR ("omics-based medicine"[Title/Abstract]) OR ("individualized therapy*"[Title/Abstract]) OR ("genomic-guided therapy"[Title/Abstract]) OR ("systems medicine"[MeSH Terms])))) | 129 |
